# Supplementary material for: Machine Learning Model to Stratify the Risk of Lymph Node Metastasis for Early Gastric Cancer: A Single-Center Cohort Study
Source: MDPI journal article supplement (doi:10.3390/cancers14051121), 2022-02-22
Supplement: s1 [file s1]

# Machine Learning Model to Stratify the Risk of Lymph Node Metastasis for Early Gastric Cancer: A Single-Center Cohort Study

Ji-Eun Na <sup>1,2,†</sup>, Yeong-Chan Lee <sup>3,†</sup>, Tae-Jun Kim <sup>1,\*</sup>, Hyuk Lee <sup>1,\*</sup>, Hong-Hee Won <sup>3</sup>, Yang-Won Min <sup>1</sup>, Byung-Hoon Min <sup>1</sup>, Jun-Haeng Lee <sup>1</sup>, Poong-Lyul Rhee <sup>1</sup> and Jae J. Kim <sup>1</sup>

<sup>1</sup> Department of Medicine, Samsung Medical Center, Sungkyunkwan University School of Medicine, Seoul 06351, Korea; jieun90.na@samsung.com (J.-E.N.); yangwon.min@samsung.com (Y.-W.M.); lamsu.min@samsung.com (B.-H.M.); jh2145.lee@samsung.com (J.-H.L.); pl.rhee@samsung.com (P.-L.R.); jaej.kim@samsung.com (J.J.K.)

<sup>2</sup> Department of Medicine, Inje University Haeundae Paik Hospital, Busan 48108, Korea

<sup>3</sup> Department of Digital Health, Samsung Advanced Institute for Health Sciences & Technology (SAIHST), Sungkyunkwan University of Medicine, Seoul 06351, Korea; conan\_8th@naver.com (Y.-C.L.); wonhh@skku.edu (H.-H.W.)

\* Correspondence: taejunk91@gmail.com (T.-J.K.); leehyuk@skku.edu (H.L.); Tel.: +82-234-103-409 (T.-J.K. & H.L.); Fax: +82-234-106-983 (T.-J.K. & H.L.)

† These authors contributed equally to this work.

**Table S1.** Best hyperparameters selected from the search algorithm.

|                           | Logistic regression                                                         | RF                                                          | SVM                                                                                                              |
|---------------------------|-----------------------------------------------------------------------------|-------------------------------------------------------------|------------------------------------------------------------------------------------------------------------------|
| Best hyperparameters      | {'C': 0.0164, 'penalty': 'l2'}                                              | {'C': 1.0437, 'gamma': 0.0108}                              | {'n_estimators': 500, 'max_depth': 10, 'criterion': 'entropy'}                                                   |
| Hyperparameter candidates | {'penalty': ['l1', 'l2', 'elasticnet', 'none'], 'C': loguniform(1e-2, 1e2)} | {'C': loguniform(1e0, 1e3), 'gamma': loguniform(1e-2, 1e2)} | {'n_estimators': [100, 200, 300, 500, 700, 1000], 'criterion': ['gini', 'entropy'], 'max_depth': [10, 20, None]} |

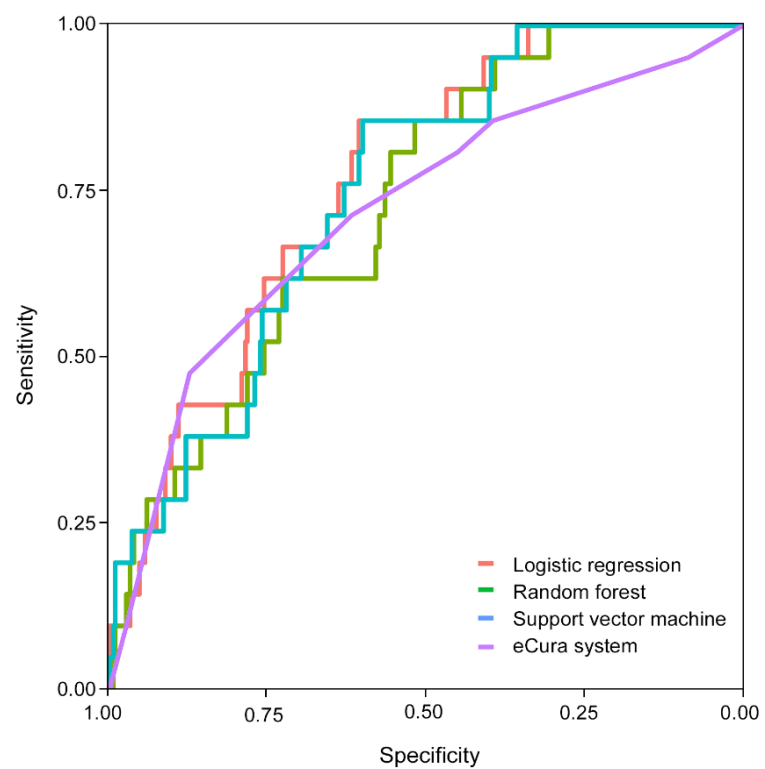

| Prediction model       | AUROC (95% CI)   | NRI (95% CI)      | Specificity (%) at high-sensitivity cutoff 95% |
|------------------------|------------------|-------------------|------------------------------------------------|
| Logistic regression    | 0.76 (0.67–0.85) | 0.46 (0.31–0.62)  | 39                                             |
| Random forest          | 0.73 (0.63–0.83) | 0.04 (–0.11–0.20) | 38                                             |
| Support vector machine | 0.75 (0.65–0.83) | 0.21 (0.16–0.25)  | 38                                             |
| eCura system           | 0.72 (0.58–0.83) |                   | 9                                              |

**Figure S1.** Performance of the machine learning model and eCura system for predicting lymph node metastasis in patients with non-curative resection after endoscopic resection.
